# Supplementary material for: Analysis of FII crystals of sulfathiazole: epitaxial growth of FII on FIV
Source: Royal Society of Chemistry journal article supplement (doi:10.1039/c0ce00221f), 2010-10-06
Supplement: c0ce00221f.pdf [file c0ce00221f.pdf]

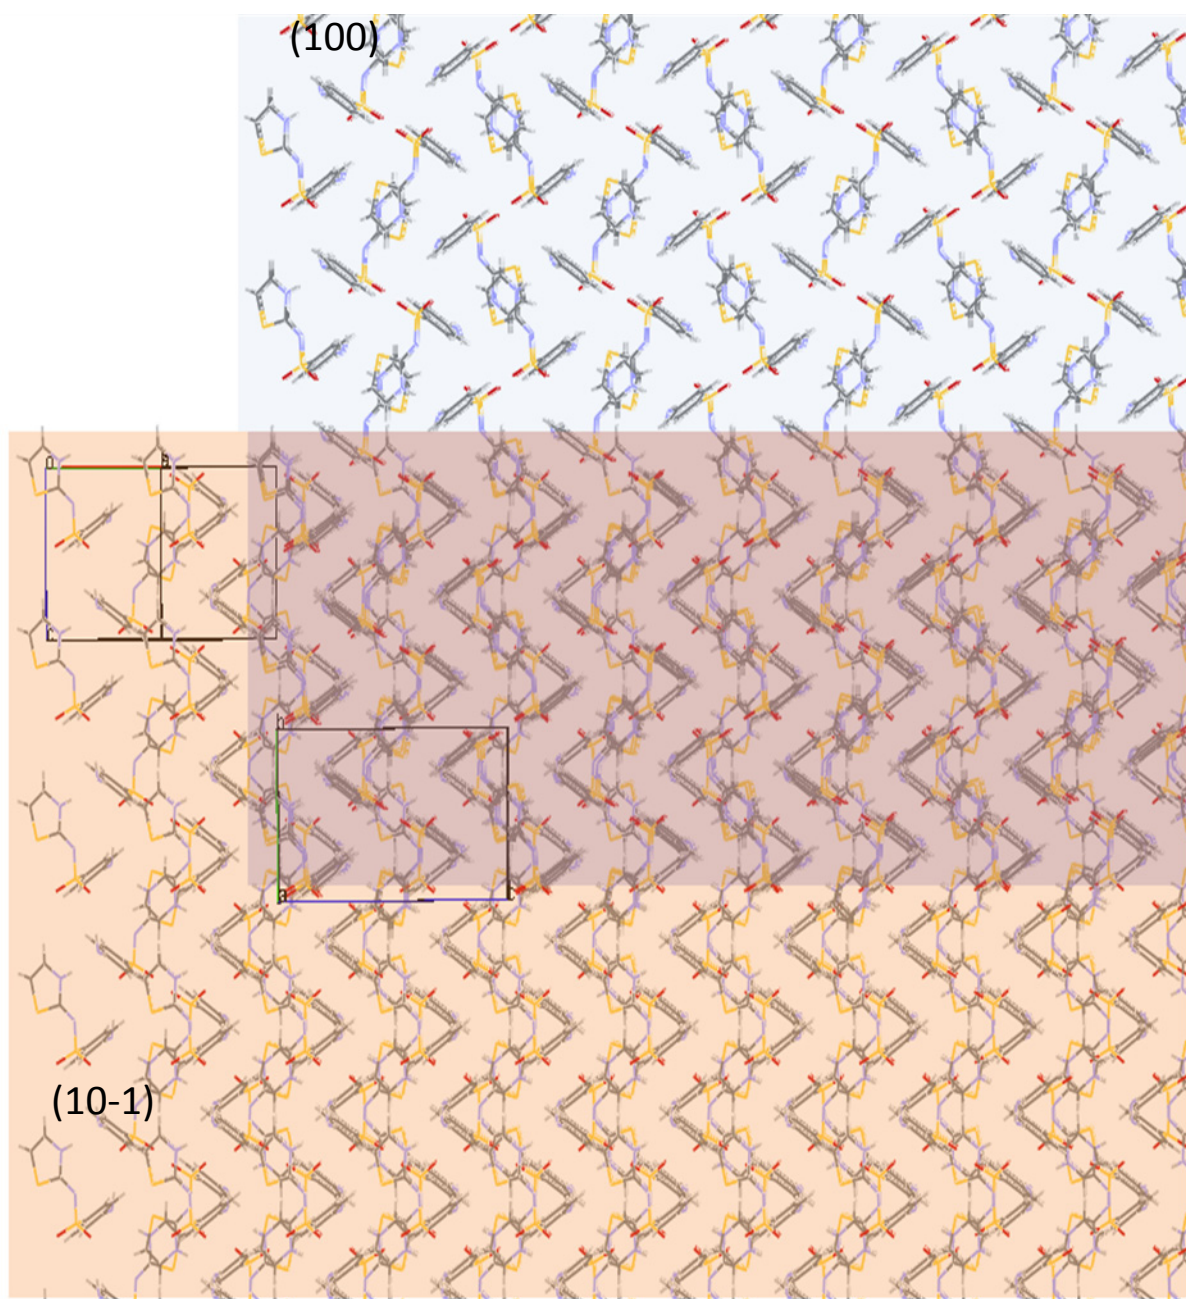

Figure 8 Mercury 2.2 representation of the molecular packing in FII and FIV Sulphathiazole viewed from the proposed faces in contact showing how the structures align. The (100) face in FII is highlighted in blue and (10-1) face in FIV is highlighted in red. The overlapping zone is highlighted in purple.

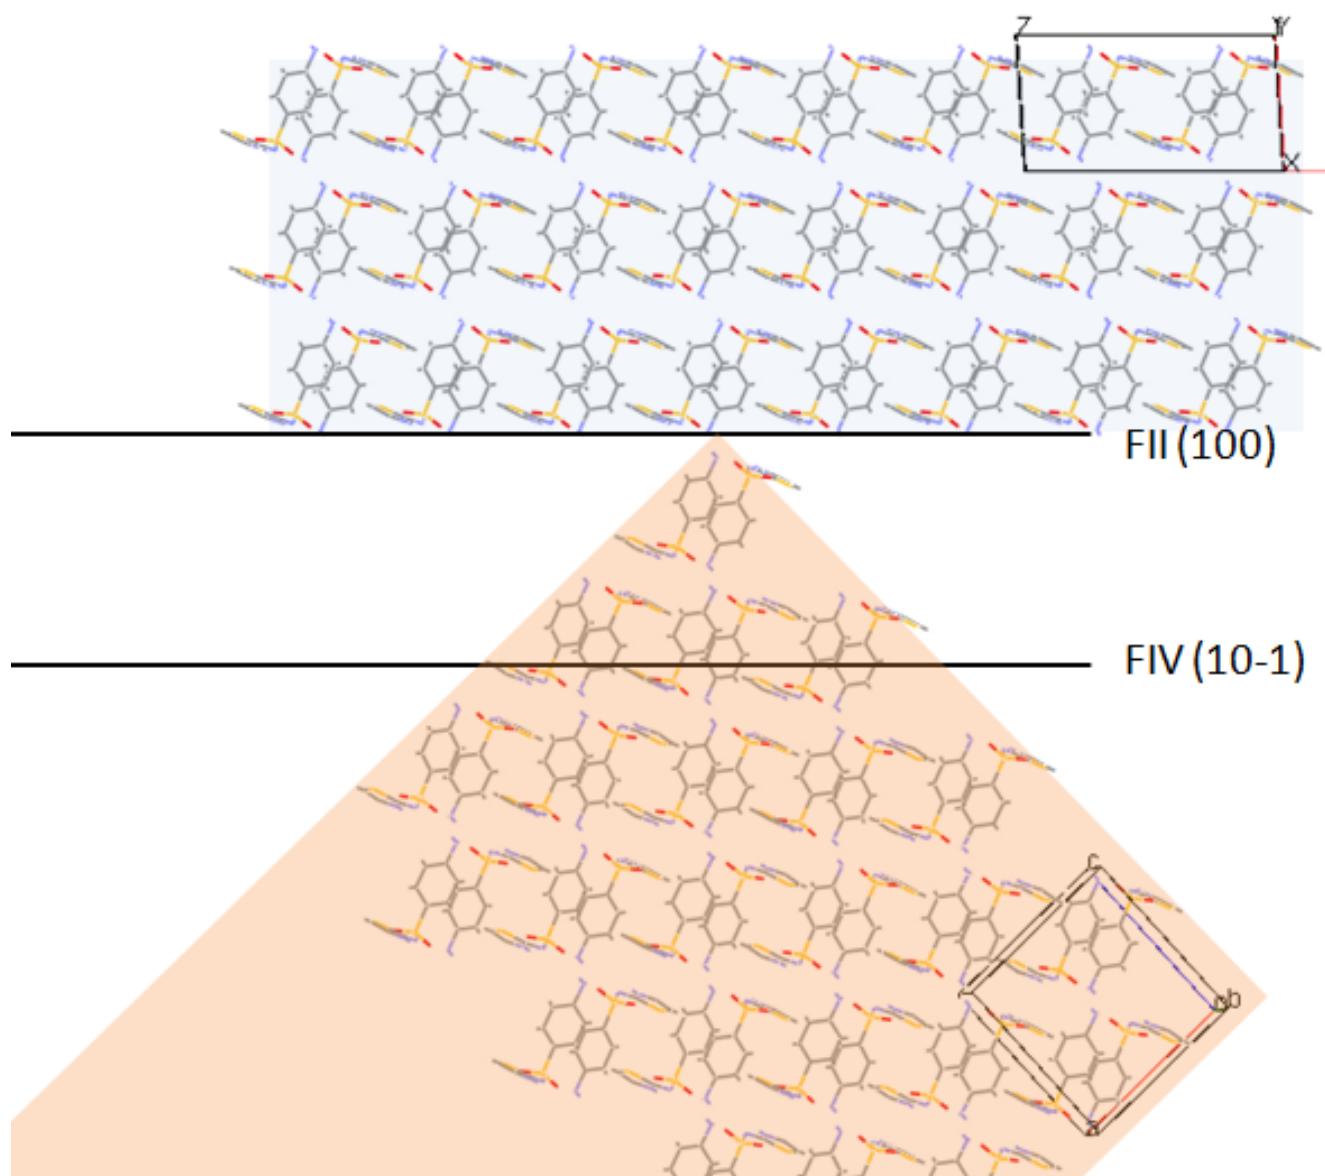

Figure 9 Mercury 2.2 representation of the molecular packing in FII & FIV Sulphathiazole. FII in blue and FIV in red. The parallel planes of FII (100) and FIV (10-1) are indicated. These are the planes we hypothesise are joined together to form the FIV layer. Mercury file SUTHAZ (FII) and SUTHAZ04 (FIV) from CCDC were used
